# Supplementary material
Source: PubMed Central journal article supplement (PMC4622623)

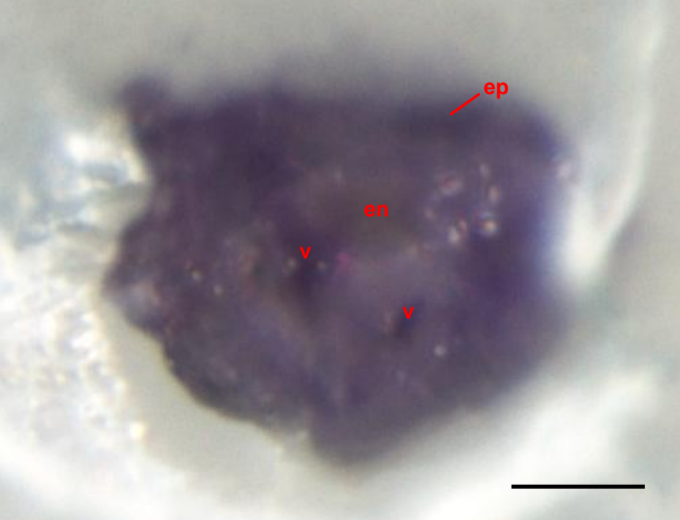

ep

en

v

v

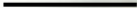

Supplement: kpsb-10-07-1027850-s001.pdf [file kpsb-10-07-1027850-s001.pdf]
